# Supplementary material
Source: Springer Nature journal article supplement (https://www.springermedizin.de/resource/supplementary/12884_2013_852_MOESM3_ESM.pdf/9458348)

**Controls N=65**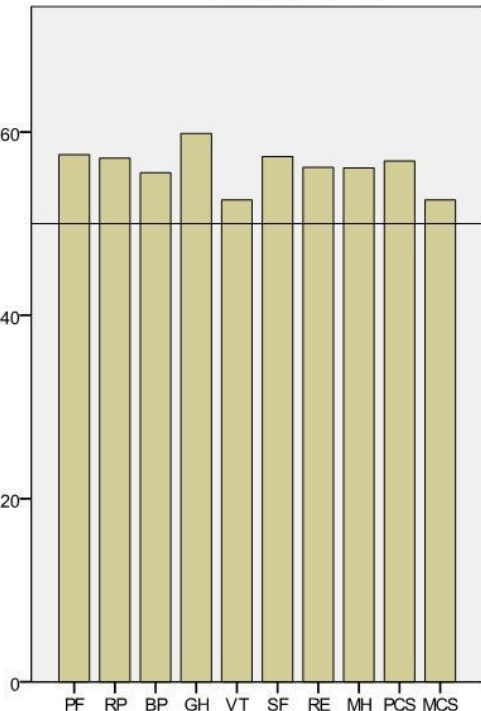**Patients N=62**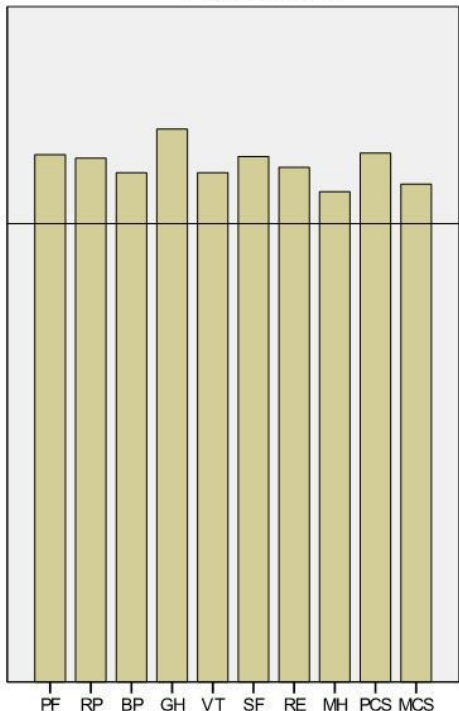

Supplement: MOESM3 [file 9458348]
